# Supplementary material
Source: publisher figshare collection journal article supplement (https://tandf.figshare.com/ndownloader/files/30926185)
Supplement: Supplementary file 1 [file 30926185]

Table S1 Primary antibodies used in this study.

| **Antibodies** | **Source** | **Identifier** | **Host** |
| --- | --- | --- | --- |
| NSUN2 | Proteintech | 20854-1-AP | Rabbit |
| ALYREF | Proteintech | 16690-1-AP | Rabbit |
| CDKN1A | Abcam | ab109199 | Rabbit |
| CCNA2 | Huabio | ET1612-8 | Rabbit |
| CCND1 | Cell Signaling technology | #2978 | Rabbit |
| CDK1 | Huabio | ET1607-51 | Rabbit |
| CDK2 | Huabio | ET1602-6 | Rabbit |
| CDK4 | Huabio | ET1612-1 | Rabbit |
| ACTB | Huabio | R1207-1 | Rabbit |
| Anti-m5C | Epigentek | 33D3 | Mouse |
| IgG | ABclonal | AC011 | Mouse |

Table S2 Primers for amplifying each target

| **Name** | **Sequence（5’-3’）** |
| --- | --- |
| *PPARG*-F | TGGGTGAAACTCTGGGAGATTC |
| *PPARG*-R | AGAGGTCCACAGAGCTGATTCC |
| *C/EBPA*-F | GGTTTCGGGTCGCTGGATCTCTAG |
| *C/EBPA*-R | ACGGCCTGACTCCCTCATCTTAGAC |
| *FABP4*-F | GACGACAGGAAGGTGAAGAG |
| *FABP4*-R | ACATTCCACCACCAGCTTGT |
| *CDKN1A*-F | ACAGCGATATCCAGACATTCAG |
| *CDKN1A*-R | CCCACAGCAGAAGAGGGC |
| *RNU6*-F | CTCGCTTCGGCAGCACA |
| *RNU6*-R | AACGCTTCACGAATTTGCGT |
| IP-*CDKN1A*-F | TCCACTCAGATTGTAAGCGTCTC |
| IP-*CDKN1A*-R | TTATTGAGCACCAGCTTTGGG |
| *ACTB*-F | ATATCGCTGCGCTGGTCGTC |
| *ACTB*-R | AGATGGCGTGAGGGAGAGC |
| *CDKN1A*-BS-F | TTTTTTGTTTTTATTTAGATTGTAAGYG |
| *CDKN1A*-BS-R | ATCRAAAAATATTTATTAAACACCAACT |
